# Supplementary material
Source: HighWire-hosted journal article supplement (doi:10.1101/rna.036608.112)
Supplement: SupTableS1.docx [file SupTableS1.docx]

Table S1. Oligonuleotides used in this study
