# Supplementary material
Source: HighWire-hosted journal article supplement (doi:10.1101/rna.036608.112)
Supplement: SupTableS2.docx [file SupTableS2.docx]

Table S2. Expression of miRNAs detected using Real-time array analysis
