# Supplementary material
Source: HighWire-hosted journal article supplement (doi:10.1101/rna.036608.112)
Supplement: SupTableS3.docx [file SupTableS3.docx]

Table S3. Fold change of proteins within XPO5 knockdown MEF cells
